# Supplementary material
Source: PubMed Central journal article supplement (PMC7347444)
Supplement: NIHMS1596653-supplement-1.pdf [file NIHMS1596653-supplement-1.pdf]

**Supplemental Figure 1: Authentication of tissue-specific KHK deficient mice (Related to Figures 2 and 3 and STAR Methods).**

**A)** Schematic depicting the approach to flox out exons 3 and 4 of the *khk* gene in mice ( $KHK^{F1/F1}$ ) and the development of specific liver ( $KHK^{F1/F1}$ -*CreAlb*) and gut ( $KHK^{F1/F1}$ -*CreVil*) mice *KHK* knockout mice.

**B)** Representative western blot ( $n = 3$  total blots) for KHK-A, KHK-C and actin loading control in liver of wild type (WT) and  $KHK^{F1/F1}$  mice.

**C)** Representative western blot ( $n = 3$  total blots) for KHK-A, KHK-C and actin loading control in liver, kidney and jejunum of  $KHK^{F1/F1}$ ,  $KHK$ -A/C KO,  $KHK^{F1/F1}$ X*Cre-Alb* and  $KHK^{F1/F1}$ -*CreVil* mice.

**D)** Densitometry for KHK-A and KHK-C (normalized to actin loading control) for 6 different animals in each group. The data in D) were presented as the means  $\pm$  SEM and analyzed by One Way ANOVA with Tukey post hoc analysis.  $**P < 0.01$ .  $n = 6$  mice per group.

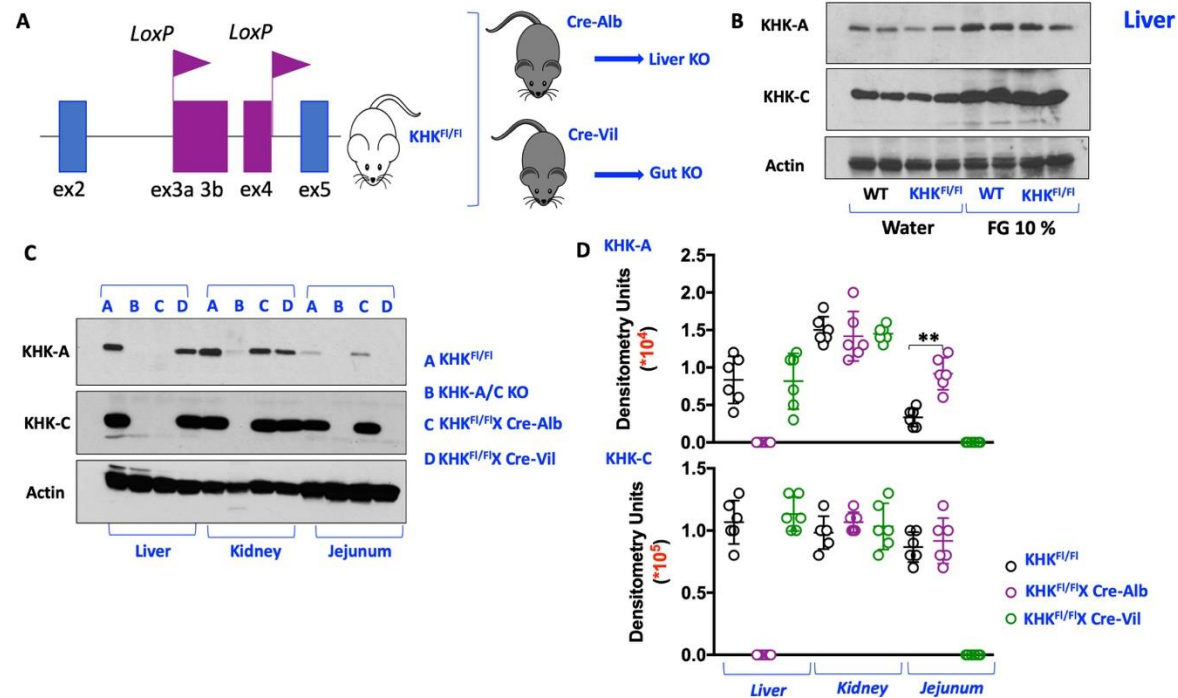

**Supplemental Figure 2: Validation of Glut5 antibody in jejunal samples of mice (Related to STAR Methods).**

**A)** Representative western blot ( $n = 2$  total blots) against glut5 and actin loading control in jejunal samples of wild type (WT, left) and glut5 knockout (KO, right) mice using antibody from Millipore, 07-1406 lot 2999837). Of note, a nonspecific band is present at a slightly higher size (52 kDa).

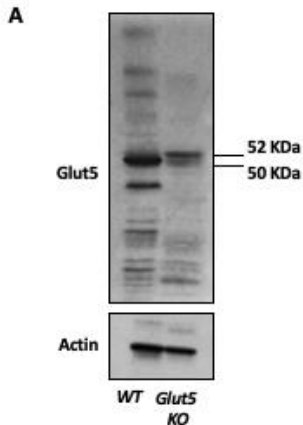

**Supplemental Table 1: General Parameters in wild type (WT) and fructokinase knockout (KHK-A/C KO) exposed to water control, 10% FG or 30% FG (Related to Figure 2).** \*  $P < 0.05$  and \*\*  $P < 0.01$  versus respective water controls. One way ANOVA Tukey post hoc analysis, n=6 mice per group.

|                                                   | WT Water<br>(n=6) | WT FG 10%<br>(n=6)   | WT FG 30%<br>(n=6)   | KHK-A/C KO<br>Water (n=6) | KHK-A/C KO<br>FG 10% (n=6) | KHK-A/C KO<br>FG 30% (n=6) | WT FG 10%<br>vs<br>KHK-A/C KO<br>FG 30%<br>ANOVA |
|---------------------------------------------------|-------------------|----------------------|----------------------|---------------------------|----------------------------|----------------------------|--------------------------------------------------|
| <b>Body Weight and composition</b>                |                   |                      |                      |                           |                            |                            |                                                  |
| Body Weight;<br>0W (g)                            | 22.3 ± 0.5        | 23.1 ± 0.7           | 23.4 ± 0.8           | 24.2 ± 0.6                | 22.7 ± 1.3                 | 22.4 ± 1.4                 | NS                                               |
| Body Weight;<br>30W (g)                           | 32.2 ± 2.7        | <b>43.5 ± 1.1**</b>  | <b>50.0 ± 1.4**</b>  | 30.4 ± 1.0                | <b>33.0 ± 1.1**</b>        | <b>33.1 ± 1.2**</b>        | $P < 0.01$                                       |
| ΔBody Weight;<br>30W (g)                          | 8.9 ± 2.2         | <b>20.4 ± 1.7**</b>  | <b>26.6 ± 2.0**</b>  | 6.2 ± 1.1                 | <b>10.3 ± 0.9**</b>        | <b>10.7 ± 0.9**</b>        | $P < 0.01$                                       |
| Average Food<br>Intake (g/day)                    | 3.23 ± 0.3        | <b>2.81 ± 0.3**</b>  | <b>2.65 ± 0.2**</b>  | 3.15 ± 0.3                | <b>2.71 ± 0.3**</b>        | <b>2.81 ± 0.2*</b>         | NS                                               |
| Water/FG<br>Intake<br>(ml/day)                    | 3.1 ± 0.2         | <b>12.1 ± 0.7**</b>  | <b>8.65 ± 1.3**</b>  | 3.2 ± 0.1                 | 3.7 ± 0.2                  | 3.9 ± 0.2                  | $P < 0.01$                                       |
| Cumulative<br>Caloric Intake<br>30W               | 2105 ± 106        | <b>2846 ± 93**</b>   | <b>3690 ± 225**</b>  | 2051 ± 121                | 2077 ± 72                  | <b>2886 ± 122**</b>        | NS                                               |
| Cumulative<br>Caloric<br>Intake/BW<br>30W         | 65.3 ± 13         | 65.4 ± 26            | 73.8 ± 31            | 67.4 ± 16                 | 62.7 ± 16                  | 87.1 ± 21                  | NS                                               |
| Cumulative<br>Calories from<br>Fructose; 30W      | 0                 | <b>607 ± 45**</b>    | <b>1217 ± 202**</b>  | 0                         | <b>184 ± 14**</b>          | <b>592 ± 35**</b>          | NS                                               |
| Cumulative<br>Calories from<br>Fructose/BW<br>30W | 0                 | <b>13.9 ± 3**</b>    | <b>24.2 ± 7**</b>    | 0                         | <b>5.6 ± 2**</b>           | <b>17.8 ± 4**</b>          | NS                                               |
| Liver Weight;<br>30 W (g)                         | 1.44 ± 0.25       | <b>2.35 ± 0.15**</b> | <b>3.13 ± 0.35**</b> | 1.35 ± 0.32               | 1.46 ± 0.26                | 1.40 ± 0.25                | $P < 0.01$                                       |
| Epididymal Fat<br>Weight; 30W<br>(g)              | 0.86 ± 0.19       | <b>2.35 ± 0.27**</b> | <b>2.88 ± 0.14*</b>  | 1.05 ± 0.20               | 1.26 ± 0.30                | 1.22 ± 0.32                | $P < 0.01$                                       |
| <b>Biochemical Blood Analysis</b>                 |                   |                      |                      |                           |                            |                            |                                                  |
| AST (IU/L)                                        | 44 ± 6            | <b>117 ± 13**</b>    | <b>149 ± 14**</b>    | 39 ± 5                    | 45 ± 6                     | 39 ± 5                     | $P < 0.01$                                       |
| ALT (IU/L)                                        | 25 ± 4            | <b>66 ± 12**</b>     | <b>89 ± 16**</b>     | 21 ± 6                    | 26 ± 5                     | 22 ± 7                     | $P < 0.01$                                       |

|                               |             |                     |                      |             |                  |                     |        |
|-------------------------------|-------------|---------------------|----------------------|-------------|------------------|---------------------|--------|
| Serum Triglycerides (mg/dl)   | 56.6 ± 6.5  | 62.2 ± 7.1          | <b>71.1 ± 10.1*</b>  | 43.3 ± 5.7  | 40.5 ± 6.0       | 51.5 ± 6.3          | NS     |
| Fasting Serum Glucose (mg/dl) | 96 ± 6.2    | 104 ± 3.5           | <b>136 ± 12.2**</b>  | 91 ± 4.2    | 98 ± 5.0         | 98.5 ± 2.5          | NS     |
| Fasting Insulin (ng/ml)       | 2.23 ± 0.4  | <b>5.88 ± 1.1**</b> | <b>9.03 ± 2.1**</b>  | 2.33 ± 0.4  | 2.43 ± 0.7       | 2.53 ± 0.2          | P<0.01 |
| HOMA-IR                       | 1.3 ± 0.2   | <b>3.7 ± 1.02**</b> | <b>7.5 ± 2.4**</b>   | 1.3 ± 0.2   | 1.5 ± 0.2        | 1.5 ± 0.3           | P<0.01 |
| OGTT (AUC/10)                 | 412 ± 55    | <b>656 ± 35**</b>   | <b>766 ± 43**</b>    | 388 ± 23    | 422 ± 55         | 395 ± 15            | P<0.01 |
| Fasting Leptin (ng/ml)        | 4.72 ± 0.5  | <b>9.98 ± 1.6**</b> | <b>15.32 ± 2.9**</b> | 4.65 ± 0.5  | 5.31 ± 0.4       | 4.85 ± 0.7          | P<0.01 |
| Serum Creatinine (mg/dl)      | 0.13 ± 0.03 | 0.09 ± 0.02         | 0.18 ± 0.03          | 0.12 ± 0.02 | 0.13 ± 0.04      | 0.15 ± 0.03         | NS     |
| Serum BUN (mg/dl)             | 21.2 ± 3.5  | <b>13.3 ± 3.5**</b> | 24.8 ± 2.5           | 26.5 ± 2.8  | 28.2 ± 4.5       | 25.5 ± 3.8          | P<0.01 |
| FGF21 (pg/ml)                 | 396 ± 72    | <b>5386 ± 617**</b> | <b>6915 ± 727**</b>  | 286 ± 45    | <b>421 ± 42*</b> | <b>1107 ± 160**</b> | P<0.01 |
| <b>Liver Analysis</b>         |             |                     |                      |             |                  |                     |        |
| Triglycerides (mg/g)          | 43 ± 13     | <b>145 ± 23**</b>   | <b>193 ± 12**</b>    | 44 ± 6      | 40 ± 10          | 33 ± 12             | P<0.01 |
| <i>Fgf21</i> mRNA (AU)        | 0.93 ± 0.3  | <b>7.65 ± 0.8**</b> | <b>8.26 ± 1.1**</b>  | 0.43 ± 0.1  | 0.51 ± 0.1       | 1.06 ± 0.4          | P<0.01 |

**Supplemental Table 2: General Parameters in  $KHK^{F/F}$  and gut-specific fructokinase knockout ( $KHK^{F/F}XCre-Vil$ ) exposed to water control, 10% FG or 30% FG (related to Figure 3). \*  $P < 0.05$  and \*\*  $P < 0.01$  versus respective water controls. One way ANOVA Tukey post hoc analysis, n=6 mice per group except for portal vein AUC (n=3).**

|                                                   | $KHK^{F/F}$<br>Water (n=6) | $KHK^{F/F}$ FG<br>10% (n=6) | $KHK^{F/F}$ FG<br>30% (n=6) | $KHK^{F/F}XCre-$<br>Vil Water<br>(n=6) | $KHK^{F/F}XCre-$<br>Vil FG 10%<br>(n=6) | $KHK^{F/F}XCre-$<br>Vil FG 30%<br>(n=6) | $KHK^{F/F}$<br>FG 10%<br>vs<br>$KHK^{F/F}XCre-$<br>Vil FG 30%<br>ANOVA |
|---------------------------------------------------|----------------------------|-----------------------------|-----------------------------|----------------------------------------|-----------------------------------------|-----------------------------------------|------------------------------------------------------------------------|
| <b>Body Weight and composition</b>                |                            |                             |                             |                                        |                                         |                                         |                                                                        |
| Body Weight;<br>0W (g)                            | 23.1 ± 0.4                 | 23.4 ± 0.6                  | 22.5 ± 0.6                  | 23.6 ± 0.3                             | 22.9 ± 0.4                              | 22.8 ± 0.6                              | NS                                                                     |
| Body Weight;<br>30W (g)                           | 33.6 ± 1.9                 | <b>46.3 ± 3.5**</b>         | <b>51.3 ± 2.7**</b>         | 33.4 ± 1.1                             | <b>37.3 ± 1.2**</b>                     | <b>44.9 ± 3.4**</b>                     | NS                                                                     |
| ΔBody Weight;<br>30W (g)                          | 10.5 ± 1.4                 | <b>22.9 ± 2.1**</b>         | <b>28.8 ± 1.6**</b>         | 9.8 ± 0.8                              | <b>14.4 ± 0.7**</b>                     | <b>22.1 ± 1.9**</b>                     | NS                                                                     |
| Average Food<br>Intake (g/day)                    | 3.16 ± 0.4                 | <b>2.75 ± 0.4**</b>         | <b>2.88 ± 0.2**</b>         | 3.06 ± 0.2                             | <b>2.65 ± 0.5**</b>                     | <b>2.70 ± 0.1**</b>                     | NS                                                                     |
| Water/FG<br>Intake<br>(ml/day)                    | 3.1 ± 0.2                  | <b>14.1 ± 1.1**</b>         | <b>7.8 ± 1.1**</b>          | 3.1 ± 0.1                              | 3.1 ± 0.2                               | 3.7 ± 0.4                               | $P < 0.01$                                                             |
| Cumulative<br>Caloric Intake<br>30W               | 2104 ± 97                  | <b>3016 ± 118**</b>         | <b>3694 ± 172**</b>         | 2050 ± 111                             | 2027 ± 58                               | <b>2835 ± 111**</b>                     | NS                                                                     |
| Cumulative<br>Caloric<br>Intake/BW<br>30W         | 63.7 ± 8                   | 65.1 ± 22                   | 72.0 ± 36                   | 61.3 ± 8                               | 54.3 ± 10                               | 63.1 ± 12                               | NS                                                                     |
| Cumulative<br>Calories from<br>Fructose; 30W      | 0                          | <b>709 ± 45**</b>           | <b>1181 ± 73**</b>          | 0                                      | <b>155 ± 19**</b>                       | <b>661 ± 28**</b>                       | NS                                                                     |
| Cumulative<br>Calories from<br>Fructose/BW<br>30W | 0                          | <b>15.3 ± 5**</b>           | <b>23.1 ± 3**</b>           | 0                                      | <b>4.1 ± 1**</b>                        | <b>14.7 ± 5**</b>                       | NS                                                                     |
| Liver Weight;<br>30 W (g)                         | 1.49 ± 0.10                | <b>2.45 ± 0.08**</b>        | <b>3.01 ± 0.25**</b>        | 1.49 ± 0.12                            | <b>1.96 ± 0.20**</b>                    | <b>2.63 ± 0.18**</b>                    | NS                                                                     |
| Epididymal Fat<br>Weight; 30W<br>(g)              | 0.94 ± 0.23                | <b>2.06 ± 0.12**</b>        | <b>2.75 ± 0.33*</b>         | 0.89 ± 0.25                            | 1.16 ± 0.20                             | <b>1.91 ± 0.35**</b>                    | NS                                                                     |
| <b>Biochemical Blood Analysis</b>                 |                            |                             |                             |                                        |                                         |                                         |                                                                        |
| AST (IU/L)                                        | 42 ± 7                     | <b>104 ± 12**</b>           | <b>145 ± 13**</b>           | 41 ± 4                                 | 50 ± 11                                 | <b>80 ± 11**</b>                        | $P < 0.01$                                                             |
| ALT (IU/L)                                        | 23 ± 6                     | <b>56 ± 9**</b>             | <b>94 ± 8**</b>             | 20 ± 7                                 | 25 ± 5                                  | <b>61 ± 10**</b>                        | NS                                                                     |

|                               |            |                     |                      |             |                    |                      |        |
|-------------------------------|------------|---------------------|----------------------|-------------|--------------------|----------------------|--------|
| Serum Triglycerides (mg/dl)   | 44.6 ± 5.8 | 64.2 ± 10.1*        | <b>68.2 ± 8.6*</b>   | 39.3 ± 4.6  | 42.7 ± 4.6         | <b>63.3 ± 5.2**</b>  | NS     |
| Fasting Serum Glucose (mg/dl) | 92 ± 8.0   | 101 ± 4.5           | 129 ± 8.5**          | 93 ± 3.5    | 94 ± 3.6           | <b>114.5 ± 4.4**</b> | P<0.01 |
| Fasting Insulin (ng/ml)       | 2.06 ± 0.3 | <b>4.97 ± 0.9**</b> | <b>7.89 ± 1.6**</b>  | 2.13 ± 0.2  | 2.55 ± 0.3         | <b>4.16 ± 0.5**</b>  | NS     |
| HOMA-IR                       | 1.2 ± 0.2  | <b>3.2 ± 0.4**</b>  | <b>6.2 ± 1.2**</b>   | 1.2 ± 0.2   | 1.4 ± 0.2          | <b>3.4 ± 0.2**</b>   | NS     |
| OGTT (AUC/10)                 | 433 ± 35   | <b>612 ± 23**</b>   | <b>812 ± 36**</b>    | 404 ± 40    | 416 ± 33           | <b>585 ± 55**</b>    | NS     |
| Fasting Leptin (ng/ml)        | 4.33± 0.3  | <b>7.72 ± 1.4**</b> | <b>15.55 ± 2.3**</b> | 4.22 ± 0.3  | 4.46 ± 0.3         | 8.75 ± 1.7**         | NS     |
| Serum Creatinine (mg/dl)      | 0.12± 0.02 | <b>0.07±0.02**</b>  | 0.15 ± 0.03          | 0.12 ± 0.02 | 0.14 ± 0.02        | 0.13± 0.02           | P<0.01 |
| Serum BUN (mg/dl)             | 25.6 ± 5.8 | <b>16.4 ± 4.5*</b>  | 26.7 ± 3.3           | 22.6 ± 3.4  | 24.1 ± 3.1         | 21.6 ± 6.7           | NS     |
| FGF21 (pg/ml)                 | 544 ± 83   | <b>5580 ± 428**</b> | <b>5956 ± 363**</b>  | 428 ± 45    | <b>3680 ± 125*</b> | <b>5152 ± 556**</b>  | NS     |
| <b>Liver Analysis</b>         |            |                     |                      |             |                    |                      |        |
| Triglycerides (mg/g)          | 46 ± 8     | <b>150 ± 26**</b>   | <b>180 ± 14**</b>    | 45 ± 10     | <b>84 ± 15**</b>   | <b>140 ± 12**</b>    | NS     |
| <i>Fgf21</i> mRNA (AU)        | 0.96 ± 0.4 | <b>6.62 ± 0.7**</b> | <b>7.97 ± 0.6**</b>  | 1.22 ± 0.2  | 3.34 ± 0.8         | 6.16 ± 0.9           | NS     |

**Supplemental Table 3: General Parameters in *KHK<sup>Fl/Fl</sup>* and liver-specific fructokinase knockout (*KHK<sup>Fl/Fl</sup>XCre-Alb*) exposed to water control or 10% FG (related to Figure 4). \*  $P < 0.05$  and \*\*  $P < 0.01$  versus respective water controls. One way ANOVA Tukey post hoc analysis, n=6 mice per group.**

|                                                   | <i>KHK<sup>Fl/Fl</sup></i><br>Water (n=6) | <i>KHK<sup>Fl/Fl</sup></i> FG<br>10% (n=6) | <i>KHK<sup>Fl/Fl</sup>XCre-<br/>Alb</i> Water<br>(n=6) | <i>KHK<sup>Fl/Fl</sup>XCre-<br/>Alb</i> FG 10%<br>(n=6) | <i>KHK<sup>Fl/Fl</sup></i><br>FG 10%<br>vs<br><i>KHK<sup>Fl/Fl</sup>XCre-<br/>Alb</i> FG 10%<br>ANOVA |
|---------------------------------------------------|-------------------------------------------|--------------------------------------------|--------------------------------------------------------|---------------------------------------------------------|-------------------------------------------------------------------------------------------------------|
| <b>Body Weight and composition</b>                |                                           |                                            |                                                        |                                                         |                                                                                                       |
| Body Weight;<br>0W (g)                            | 22.7 ± 0.3                                | 22.8 ± 0.4                                 | 23.1 ± 0.5                                             | 23.4 ± 0.5                                              | NS                                                                                                    |
| Body Weight;<br>30W (g)                           | 33.0 ± 0.5                                | <b>43.1 ± 0.8**</b>                        | 32.8 ± 0.9                                             | 32.6 ± 1.5                                              | $P < 0.01$                                                                                            |
| ΔBody Weight;<br>30W (g)                          | 10.3 ± 0.8                                | <b>20.3 ± 1.2**</b>                        | 9.7 ± 1.5                                              | 9.2 ± 2.3                                               | $P < 0.01$                                                                                            |
| Average Food<br>Intake (g/day)                    | 3.20 ± 0.2                                | <b>2.71 ± 0.1**</b>                        | 3.22 ± 0.1                                             | 2.66 ± 0.2                                              | NS                                                                                                    |
| Water/FG<br>Intake<br>(ml/day)                    | 3.3 ± 0.2                                 | <b>13.7 ± 1.4**</b>                        | 3.1 ± 0.3                                              | <b>14.6 ± 1.6**</b>                                     | NS                                                                                                    |
| Cumulative<br>Caloric Intake<br>30W               | 2083±86                                   | <b>2915±95**</b>                           | 2083 ± 103                                             | <b>2963 ± 90**</b>                                      | NS                                                                                                    |
| Cumulative<br>Caloric<br>Intake/BW<br>30W         | 63.1 ± 9                                  | 67.6 ± 10                                  | 63.5 ± 12                                              | <b>90.8 ± 12**</b>                                      | $P < 0.01$                                                                                            |
| Cumulative<br>Calories from<br>Fructose; 30W      | 0                                         | <b>687 ± 38**</b>                          | 0                                                      | <b>736 ± 53**</b>                                       | NS                                                                                                    |
| Cumulative<br>Calories from<br>Fructose/BW<br>30W | 0                                         | <b>15.9 ± 5**</b>                          | <b>0</b>                                               | <b>22.5 ± 4**</b>                                       | $P < 0.05$                                                                                            |
| Liver Weight;<br>30 W (g)                         | 1.52 ± 0.13                               | <b>2.43±0.15**</b>                         | 1.42± 0.11                                             | 1.49± 0.08                                              | $P < 0.01$                                                                                            |
| Epididymal Fat<br>Weight; 30W<br>(g)              | 0.89 ± 0.34                               | <b>2.25±0.32**</b>                         | 1.05 ± 0.20                                            | 0.96 ± 0.4                                              | $P < 0.01$                                                                                            |
| <b>Biochemical Blood Analysis</b>                 |                                           |                                            |                                                        |                                                         |                                                                                                       |
| AST (IU/L)                                        | 42 ± 8                                    | <b>107 ± 26**</b>                          | 36 ± 8                                                 | 33 ± 4                                                  | $P < 0.01$                                                                                            |
| ALT (IU/L)                                        | 28 ± 4                                    | <b>59 ± 5**</b>                            | 25 ± 4                                                 | 24 ± 6                                                  | $P < 0.01$                                                                                            |

|                               |             |                     |               |                      |                |
|-------------------------------|-------------|---------------------|---------------|----------------------|----------------|
| Serum Triglycerides (mg/dl)   | 55.5 ± 7.7  | 69.2 ± 6.8 *        | 53.3 ± 4.5    | 44.8 ± 9.6           | <i>P</i> <0.01 |
| Fasting Serum Glucose (mg/dl) | 93 ± 7.0    | 105 ± 10            | 91 ± 6.5**    | 99 ± 4.0             | NS             |
| Fasting Insulin (ng/ml)       | 2.40 ± 0.3  | <b>4.84 ± 1.1**</b> | 2.08 ± 0.3    | 1.98 ± 0.5           | <i>P</i> <0.01 |
| HOMA-IR                       | 1.2 ± 0.2   | <b>3.3 ± 0.3**</b>  | 1.0 ± 0.4     | 1.2 ± 0.2            | <i>P</i> <0.01 |
| OGTT (AUC/10)                 | 466 ± 56    | <b>735 ± 35**</b>   | 385 ± 55      | 426 ± 60             | <i>P</i> <0.01 |
| Fasting Leptin (ng/ml)        | 4.01± 0.4   | <b>9.91 ± 1.7**</b> | 4.57 ± 0.7    | 4.55 ± 0.3           | <i>P</i> <0.01 |
| Serum Creatinine (mg/dl)      | 0.15± 0.04  | <b>0.08±0.02**</b>  | 0.14± 0.02    | <b>0.06 ± 0.02**</b> | NS             |
| Serum BUN (mg/dl)             | 23.7 ± 3.3  | <b>16.4 ± 3.3*</b>  | 25.0 ± 2.6    | <b>13.8 ± 3.4**</b>  | NS             |
| FGF21 (pg/ml)                 | 416 ± 56    | <b>5336 ± 126**</b> | 505 ± 45      | <b>1089 ± 154*</b>   | <i>P</i> <0.01 |
| <b>Urine Analysis</b>         |             |                     |               |                      |                |
| Fructose (nmol/mgCre)         | 74.5 ± 35.2 | 61.6 ± 40.2         | 249.3 ± 83.3  | <b>617.5± 250**</b>  | <i>P</i> <0.01 |
| <b>Liver Analysis</b>         |             |                     |               |                      |                |
| Triglycerides (mg/g)          | 55 ± 6      | <b>156 ± 23**</b>   | <b>38 ± 4</b> | 46 ± 7               | <i>P</i> <0.01 |
| <i>Fgf21</i> mRNA (AU)        | 0.99 ± 0.2  | <b>6.76 ± 0.5**</b> | 0.87 ± 0.1    | 1.06 ± 0.2           | <i>P</i> <0.01 |
